# Supplementary material for: Gastrointestinal Effects and Tolerance of Nondigestible Carbohydrate Consumption
Source: PubMed Central journal article supplement (PMC9776669; doi:10.1093/advances/nmac094), 2022-08-30
Supplement: nmac094_supplemental_file.pdf [file nmac094_supplemental_file.pdf]

| <b>Supplemental Table 1.</b> Tolerable intake dose recommendations for non-digestible carbohydrate mixtures |                                  |
|-------------------------------------------------------------------------------------------------------------|----------------------------------|
| <b>NDC</b>                                                                                                  | <b>Dose Recommendation (g/d)</b> |
| Soluble, viscous, fermentable                                                                               |                                  |
| Alginate                                                                                                    | 3.75                             |
| Guar gum                                                                                                    | 11.4                             |
| Soluble, viscous, nonfermentable                                                                            |                                  |
| Psyllium husk                                                                                               | 15                               |
| Soluble, nonviscous, fermentable                                                                            |                                  |
| Inulin                                                                                                      | 5                                |
| FOS and OF                                                                                                  | 7.8                              |
| Polydextrose                                                                                                | 12                               |
| GOS                                                                                                         | 20                               |
| Soluble and insoluble                                                                                       |                                  |
| Soy fiber                                                                                                   | 25                               |
| Resistant starch                                                                                            | 12                               |

**Abbreviations:** NDC, non-digestible carbohydrate; FOS, fructooligosaccharides; OF, oligofructose; GOS, galactooligosaccharides

**Supplemental Table 2.** Clinical trials that studied non-digestible carbohydrate consumption in children and infants without gastrointestinal disease

| Study               | Population                                                      | Design                                        | Duration                                           | Dose          | Control (vehicle)                               | Treatment (vehicle)                                | Assessment                                                                                                                                                                | Responses                                                                                                                               |
|---------------------|-----------------------------------------------------------------|-----------------------------------------------|----------------------------------------------------|---------------|-------------------------------------------------|----------------------------------------------------|---------------------------------------------------------------------------------------------------------------------------------------------------------------------------|-----------------------------------------------------------------------------------------------------------------------------------------|
| Whisner, 2016 (158) | Healthy adolescent females in the United States (n=28), 11-14 y | 3-phase, double-blind, crossover              | 4-wk doses, 3-d visits, 3-wk washouts              | 10, 20 g/d    | Maltodextrin (muffin & fruit-flavored beverage) | Promitor SCF 85 (muffin & fruit-flavored beverage) | Weekly questionnaires to assess symptoms (flatulence, bloating, abdominal pain, diarrhea, stomach noises) from 0 (no symptoms) to 5 (severe)                              | 20 g/d SCF ↑ mild flatulence & bloating compared to control*.                                                                           |
| Whisner, 2014 (150) | Healthy adolescents in the United States (n=24), 12-15 y        | Crossover                                     | Two 3-wk periods                                   | 12 g/d        | None (fruit snacks)                             | Promitor SCF 70 (fruit snacks)                     | Stomach noises, flatulence, bloating, & abdominal pain evaluated daily with questionnaire; symptom severity assessed daily using scale of 0 (none) to 10 (very severe)    | No differences in symptom severity between treatments.                                                                                  |
| Whisner, 2013 (159) | Healthy adolescent females in the United States (n=31), 10-13 y | Randomized, double-blind, 3-period, crossover | 13 wk (three 3-wk treatments, two 2-week washouts) | 5, 10 g/d     | None (smoothie drinks)                          | Vivinal GOS syrup, 59% pure (smoothie drinks)      | Weekly phone survey with free-response answers & rankings from 0 (absent) to 5 (severe) for abdominal pain, bloating, flatulence, diarrhea, stool frequency & consistency | Mean abdominal pain, bloating, flatulence, & diarrhea scores were all below 1 (hardly any symptoms), with no differences between doses. |
| Lohner, 2018 (160)  | Children in Hungary (n=219), 3-6 y                              | Parallel-group                                | 24 wk                                              | 6 g/d         | Maltodextrin (mixed in food or drink)           | Orafti ITFs (mixed in food or drink)               | Stool consistency                                                                                                                                                         | Treatment softened stool within normal range from ≥12 wk*.                                                                              |
| Moro, 2002 (151)    | Term infants in Italy (n=90)                                    | Randomized, 3-way parallel-arm                | 28 d                                               | 0.4, 0.8 g/dL | Maltodextrin (formula)                          | FOS+GOS (formula)                                  | Stool consistency rated 1 (watery) to 5 (hard) & frequency; consistency of each stool sample collected in 2 study days & mean obtained for each day; incidence of crying, | Stool frequency differed between 0.8 g/d FOS+GOS & control*. Dose-dependent influence on stool consistency.                             |

|                               |                                                                      |                                                                                 |                       |                |                                                             |                             |                                                                                                  |                                                                                                                                                                                                                                                                                   |
|-------------------------------|----------------------------------------------------------------------|---------------------------------------------------------------------------------|-----------------------|----------------|-------------------------------------------------------------|-----------------------------|--------------------------------------------------------------------------------------------------|-----------------------------------------------------------------------------------------------------------------------------------------------------------------------------------------------------------------------------------------------------------------------------------|
|                               |                                                                      |                                                                                 |                       |                |                                                             |                             |                                                                                                  | regurgitation, & vomiting                                                                                                                                                                                                                                                         |
|                               |                                                                      |                                                                                 |                       |                |                                                             |                             |                                                                                                  | Diary recording stool frequency, size, consistency, & color completed during 24 h before each weekly visit; stool consistency rated 1 (hard) to 5 (watery); stool frequency reported as number of stools in past 24 h; parent/guardian questioned on adverse events at each visit |
| Euler, 2005 (152)             | Healthy term infants in the United States (n=72), 2-6 wk             | Prospective, randomized, crossover (non-randomized human milk comparator group) | 5 wk                  | 1.5 or 3.0 g/L | None (human milk)                                           | FOS (S-26 Gold formula)     |                                                                                                  | 3.0 g/L FOS softened stool compared to 1.5 g/L FOS*.                                                                                                                                                                                                                              |
|                               |                                                                      |                                                                                 |                       |                |                                                             |                             |                                                                                                  | Incidence of crying, regurgitation, & vomiting (3-point scale) recorded in parent interview; stool characteristics of consistency (5-point scale) & frequency                                                                                                                     |
| Moro, 2006 (153)              | Infants in Italy (treatment: n=102, control: n=104) at risk of atopy | Double-blind, randomized, placebo-controlled, parallel-group                    | 6 months              | 0.8 g/100 ml   | Maltodextrin (formula)                                      | GOS+FOS (formula)           |                                                                                                  | Treatment significantly impacted stool frequency & consistency*. FOS+GOS ↓ regurgitation & crying*.                                                                                                                                                                               |
|                               |                                                                      |                                                                                 |                       |                |                                                             |                             |                                                                                                  | GOS+FOS softened stool consistency compared to control, with values closer to breastfed*. GOS+FOS ↓ colic compared to control*.                                                                                                                                                   |
| Rodriguez-Herrera, 2019 (154) | Infants in Italy & Spain (n=200), ≤28 d                              | Multi-center, prospective, double-blind, randomized, controlled                 | ≤28 days-17 wk of age | 0.8 g/100 ml   | None (non-fermented formula), none (human milk, breast-fed) | GOS+FOS (fermented formula) | Gastrointestinal symptoms, stool characteristics                                                 |                                                                                                                                                                                                                                                                                   |
|                               |                                                                      |                                                                                 |                       |                |                                                             |                             |                                                                                                  | Treatments caused looser stools compared to control*. 8 g/L ↑ frequency compared to control & 4 g/L at 30 d*. 4 g/L differed from control in diarrhea & 8 g/L differed from control in irritability*.                                                                             |
| Ziegler, 2007 (155)           | Healthy infants in the United States (n=226)                         | 3-way parallel-arm                                                              | 120 d                 | 4, 8 g/L       | None (formula)                                              | PDX+GOS (formula)           | 24-hour tolerance recall at 30, 60, 90, & 120 d of age; adverse events recorded throughout study |                                                                                                                                                                                                                                                                                   |

|                                 |                                                             |                                  |                                                      |                                               |                                 |                                            |                                                                                                      |                                                                                                  |
|---------------------------------|-------------------------------------------------------------|----------------------------------|------------------------------------------------------|-----------------------------------------------|---------------------------------|--------------------------------------------|------------------------------------------------------------------------------------------------------|--------------------------------------------------------------------------------------------------|
| Moore, 2003<br>(156)            | Healthy infants in the United States (n=56), 16-46 wk       | Parallel-arm                     | 28 d                                                 | 0.75 g/serving (mean 0.74 g/d, max 3 g/d FOS) | Maltodextrin (cereal)           | FOS (Nestle Carnation Premium Baby Cereal) | Gastrointestinal tolerance assessed by daily parental reporting (stool patterns, tolerance symptoms) | FOS softened stool consistency & ↑ frequency* compared to control. FOS well-tolerated at ≤3 g/d. |
| Waligora-Dupriet, 2007<br>(157) | 20 healthy infants & toddlers in France (n=20), 7-19 months | Double-blind, placebo-controlled | 8-d observation, 21-d treatment, 15-d post-treatment | 2 g/d                                         | Maltodextrin (cereal or drinks) | Orafti Beneo P95 OF (cereal or drinks)     | Intestinal tolerance & well-being                                                                    | OF ↓ flatulence, diarrhea, & vomiting compared to control*.                                      |

Abbreviations: FOS, fructooligosaccharides; GOS, galactooligosaccharides; OF, oligofructose; PDX, polydextrose; SCF, soluble corn fiber

\* Differences were statistically significant ( $P \leq 0.05$ ).
